# Supplementary material for: Toward color variation of long persistent luminescence in Pr3+-doped garnet transparent ceramic phosphors
Source: Royal Society of Chemistry journal article supplement (doi:10.1039/d3tc03619g), 2023-01-01
Supplement: d3tc03619g1.pdf [file d3tc03619g1.pdf]

## Supporting Information

### Toward Color Variation of Long Persistent Luminescence in Pr<sup>3+</sup>-doped Garnet Transparent Ceramic Phosphors

Qiping Du,\* Jumpei Ueda,\* and Setsuhisa Tanabe

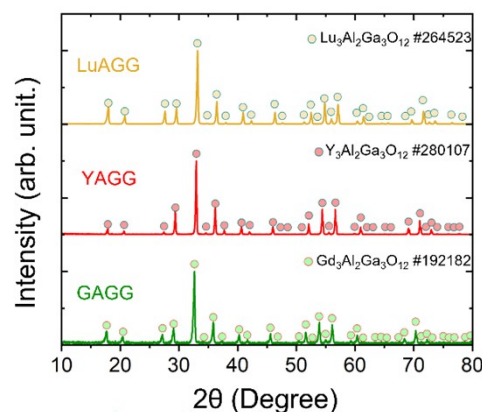

Figure S1. XRD patterns of Pr<sup>3+</sup>-doped (Ln)<sub>3</sub>Al<sub>2</sub>Ga<sub>3</sub>O<sub>12</sub> (Ln = Lu, Y and Gd) transparent ceramics.

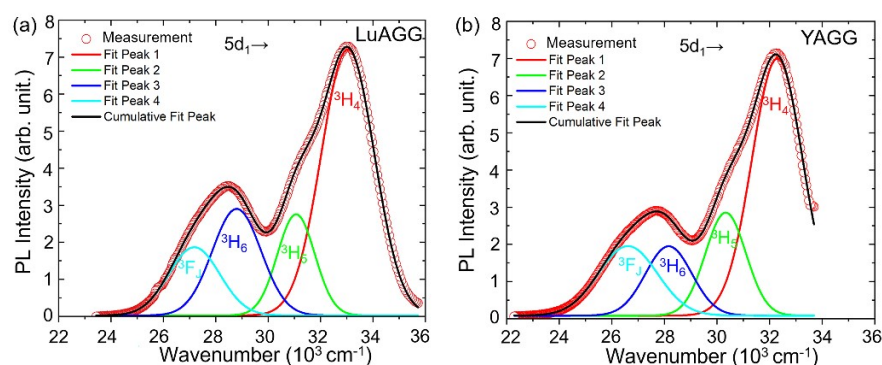

Figure S2. Deconvolution with Gaussian functions of 5d<sub>1</sub> emission bands of Pr<sup>3+</sup> in LuAGG and YAGG sample.

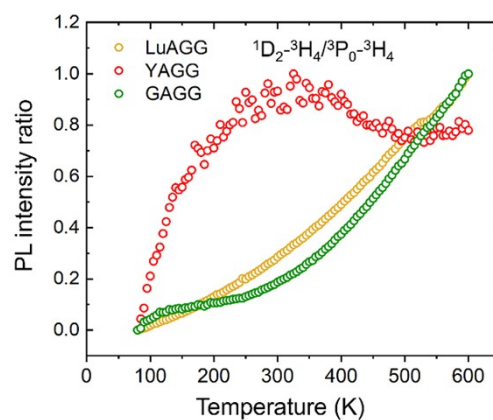

Figure S3. The temperature dependence of normalized emission intensity ratio of <sup>1</sup>D<sub>2</sub> → <sup>3</sup>H<sub>4</sub> transition and <sup>3</sup>P<sub>0</sub> → <sup>3</sup>H<sub>4</sub> transition in LnAGG: Pr<sup>3+</sup> transparent ceramics.

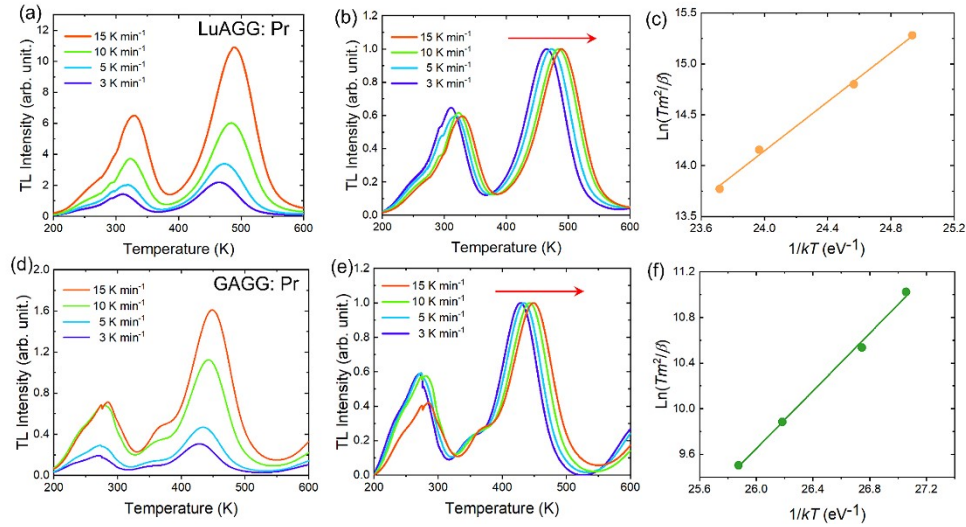

Figure S4. TL glow curves of LuAGG: Pr (a-b) and YAGG: Pr (d-e) at different heating rates (3, 5, 10, 15 K min<sup>-1</sup>) after UV charging for 5 min. Heating rate plot of LuAGG: Pr (c) and YAGG: Pr (f) to estimate the trap depth.

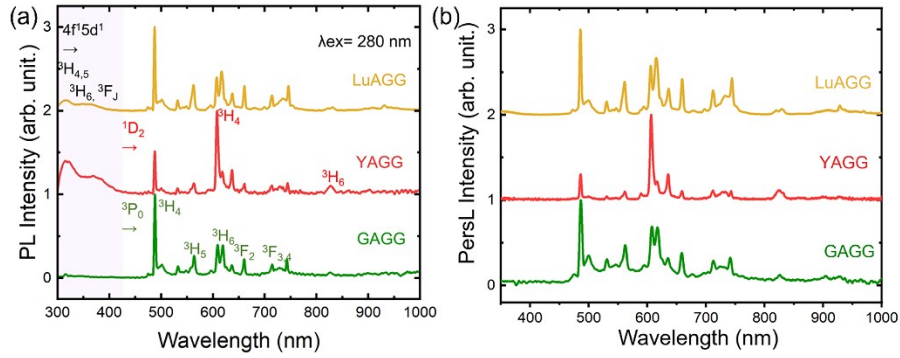

Figure S5. Comparison between PL a) and PersL b) spectra of  $LnAGG:Pr^{3+}$  samples.

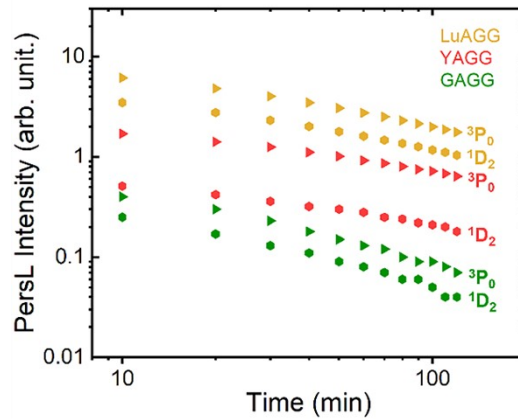

Figure S6. The PersL intensity of  ${}^3P_0 \rightarrow {}^3H_4$  and  ${}^1D_2 \rightarrow {}^3H_4$  transitions with different duration time in  $LnAGG:Pr^{3+}$  samples.

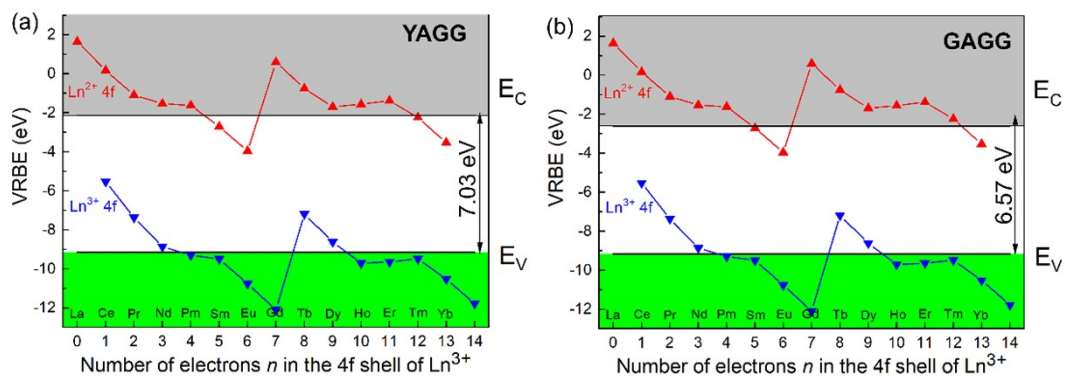

Figure S7. VRBE diagram for YAGG (a) and GAGG (b).

Table S1. The fluorescence decay parameters in LuAGG: Pr<sup>3+</sup> and YAGG: Pr<sup>3+</sup>.

| Temperature<br>(K) | LuAGG: Pr      |                        |                |                        | YAGG: Pr       |                        |                |                        |
|--------------------|----------------|------------------------|----------------|------------------------|----------------|------------------------|----------------|------------------------|
|                    | A <sub>1</sub> | τ <sub>1</sub><br>(ns) | A <sub>2</sub> | τ <sub>2</sub><br>(ns) | A <sub>1</sub> | τ <sub>1</sub><br>(ns) | A <sub>2</sub> | τ <sub>2</sub><br>(ns) |
| 150                | 276.0          | 2.8                    | 657.0          | 12.8                   | 1032.8         | 16.3                   |                |                        |
| 180                | 14120.8        | 2.6                    | 1227.5         | 12.4                   | 961.5          | 15.2                   |                |                        |
| 210                | 73041.6        | 1.8                    | 1261.7         | 11.1                   | 960.0          | 13.6                   |                |                        |
| 240                | 64350.8        | 1.9                    | 868.6          | 12.1                   | 954.1          | 11.6                   |                |                        |
| 270                | 402541.8       | 1.4                    | 822.0          | 11.6                   | 883.6          | 9.4                    |                |                        |
| 300                |                |                        |                |                        | 446.9          | 3.1                    | 519.4          | 12.5                   |
| 330                |                |                        |                |                        | 473.6          | 1.8                    | 466.9          | 8.9                    |
| 360                |                |                        |                |                        | 412.1          | 0.8                    | 599.4          | 5.1                    |
